1 **Affordable and Effective Optokinetic Response Methods to Assess Visual Acuity**  
2 **and Contrast Sensitivity in Larval to Juvenile Zebrafish**

3

4 Alicia Gómez Sánchez<sup>1,2</sup>, Yolanda Álvarez<sup>2,3</sup>, Basilio Colligris<sup>1</sup> and Breandán N. Kennedy<sup>2,3,4</sup>

5

6 <sup>1</sup>Ocupharm Diagnostic Group Research, Faculty of Optic and Optometry, Universidad Complutense  
7 de Madrid, Madrid, Spain

8 <sup>2</sup>UCD Conway Institute of Biomolecular and Biomedical Research, University College Dublin,  
9 Belfield, Dublin 4, Ireland.

10 <sup>3</sup>UCD School of Biomolecular and Biomedical Science, University College Dublin, Belfield, Dublin  
11 D04 V1W8, Ireland.

12

13 <sup>4</sup>Corresponding author, Prof. Breandán Kennedy, [brendan.kennedy@ucd.ie](mailto:brendan.kennedy@ucd.ie)

14

15

16

17

18

19

20

21

22

23

24

25

## 26 **Abstract**

### 27 **Background**

28 The optokinetic response (OKR) is an effective behavioural assay to investigate functional vision in  
29 zebrafish. The rapid and widespread use of gene editing, drug screening and environmental modulation  
30 technologies have resulted in a broader need for visual neuroscience researchers to access affordable  
31 and more sensitive OKR, contrast sensitivity (CS) and visual acuity (VA) assays. Here, we demonstrate  
32 how 2D- and 3D-printed, striped patterns or drums coupled with a motorised base and microscope  
33 provide a simple, cost-effective but efficient means to assay OKR, CS and VA in larval-juvenile  
34 zebrafish.

### 35 **Results**

36 In wild-type, 5 days post-fertilisation (dpf) zebrafish, the 2D or 3D drums printed with the standard  
37 OKR stimulus of 0.02 cycles per degree (cpd), 100% black-white contrast evoked equivalent responses  
38 of 24.2 or 21.8 saccades per minute, respectively. Furthermore, although the OKR number was  
39 significantly reduced compared to the 0.02 cpd drum ( $p < 0.0001$ ), the 2D and 3D drums evoked  
40 respectively equivalent responses with the 0.06 and 0.2 cpd drums. Notably, standard OKR responses  
41 varied with time of day; peak responses of 29.8 saccades per minute occurred in the early afternoon  
42 with significantly reduced responses occurring in the early morning or late afternoon, (18.5 and 18.4  
43 saccades per minute, respectively). A customised series of 2D printed drums enabled analysis of visual  
44 acuity and contrast sensitivity in 5-21 dpf zebrafish. The saccadic frequency in visual acuity and  
45 contrast sensitivity assays, was inversely proportional to age, spatial frequency and contrast of the  
46 stimulus.

### 47 **Conclusions**

48 OKR, VA and CS of zebrafish larvae can be efficiently measured using 2D- or 3D-printed striped  
49 drums. For data consistency the luminance of the OKR light source, the time of day when the analysis

50 is performed, and the order of presentation of VA and CS drums must be considered. These simple  
51 methods allow effective and more sensitive analysis of functional vision in zebrafish.

52

53 **Keywords**

54 Optokinetic response, visual acuity, spatial frequency, contrast sensitivity, visual function, zebrafish

55

56

57

58

59

60

61

62

63

64

65

66

67

68

69

70

71

72

73

74

## 75 **Background**

76 The ability of researchers to effectively assess functional vision is critical to understanding the  
77 ontogeny of vision, the genetic and environmental mechanisms underlying impaired vision and the  
78 efficacy of therapeutic interventions (1, 2). The optokinetic response (OKR), or optokinetic nystagmus  
79 (OKN), is an innate behavioural response in humans, (3) primates (4), mammals (5) and teleosts (6).  
80 In clinical practice, the OKN is an objective measure of visual acuity, and can be evoked by presenting  
81 moving stimuli in front of patients by changing direction or size (7, 8). In natural environments, the  
82 OKR is essential for animals to hunt, feed and avoid predators. The OKR presents as a saccadic eye  
83 movement consisting of two phases: *i*) a slow eye movement following the stimulus, in the same  
84 direction as the stimulus; and *ii*) a rapid eye movement in the opposite direction to fixate on a  
85 subsequent stimulus. These movements help to stabilise the moving image presented to the retina. (9).

86  
87 Here, we sought to generate simple and affordable tools for OKR assays in zebrafish and validate their  
88 efficacy in quantifying visual acuity and contrast sensitivity in larval and juvenile zebrafish. Zebrafish  
89 are widely used to investigate the biology of vision and blindness (10). Large clutches of embryos are  
90 readily obtained, which morphologically develop eyes within 24 hours, and by 5 days post-fertilisation  
91 (dpf) exhibit functional vision, including a robust OKR (11, 12). Commonly, OKR analyses in  
92 zebrafish only utilise one standard stimulus *i.e.* a drum of 0.02 cpd (*e.g.* 1 cm width stripes) and 100%  
93 black and white contrast stripes (13, 14). This is not sufficient to detect subtle impairments in vision.  
94 One approach to more thoroughly vision evaluations, is to vary the optokinetic stimulation. By varying  
95 the width of the stripes, visual acuity is measured efficiently (15). Altering the extent of contrast  
96 between stripes enables the measurement of contrast sensitivity (16). Such assays have previously been  
97 successfully performed in zebrafish by specialists often using automatic or semi-automated OKR  
98 stimulators and specialised software (15-17). However, such bespoke equipment is often inaccessible  
99 or unaffordable to many research groups. Here, we describe a simple and affordable method to assess

100 visual acuity and contrast sensitivity in zebrafish using 2D and 3D printed striped patterns/drums to  
101 quantify OKR, VA and CS in larval and juvenile zebrafish.

102

## 103 **Results**

104 *2D and 3D Printed Visual Acuity Patterns Elicit Equivalent OKR Responses in 5 dpf Zebrafish.*

105 The manual OKR equipment set-up (**Fig. 1**) permits simple exchange of stimulus patterns to measure  
106 visual acuity. This apparatus was assembled using a microscope (**Fig. 1A**) to observe zebrafish eye  
107 movements, a light source (**Fig. 1B**) and an electronic motor connected to a 6 cm rotating circular base  
108 (**Fig. 1C**). 2D or 3D printed stimulus drums (**Fig. 1D**) were placed on the circular base which was  
109 rotated electronically to evoke eye movements. A standard OKR pattern of 0.02 cpd, (100% contrast)  
110 (**Fig. 1E**) and customised 0.06 and 0.2 cpd patterned stimuli (**Fig. 1D**) were produced by 2D or 3D  
111 printing (*see Methods and Additional data 1 for full details on OKR assembly*).

112 Visual acuity analysis with 2D and 3D printed drums was performed on 5 dpf zebrafish larvae (~123.5  
113 hours post-fertilisation - hpf) using *Protocol 1* (see Methods) (**Fig. 2**). The OKR responses evoked by  
114 the 3D and 2D-printed drums were equivalent. More specifically, the OKR activity with the 0.02 cpd  
115 2D-printed pattern (24.2 saccades per minute) was equivalent to the 21.8 saccades per minute evoked  
116 with 0.02 cpd 3D-printed drum (**Fig 2**). Similarly, there was no significant difference between the 7.5  
117 and 5.3 saccades per minute, respectively produced by the 0.06 cpd 2D and 3D-printed drum (**Fig 2**).  
118 At the highest spatial frequency tested, 0.2 cpd, the number of saccades evoked by the 2D (7.9 saccades  
119 per minute) and 3D- (5.8 saccades per minute) drums also showed no significant difference. Therefore,  
120 both 2D and 3D printed drums can be used to measure the visual acuity of 5 dpf zebrafish larvae, the  
121 3D-printed drums offering a more durable, but more costly option.

122

123 *The Zebrafish Larval OKR Response is Modulated by Time of Day and Luminance Levels.*

124 To determine if the zebrafish larval OKR has diurnal variations, the number of saccades generated  
125 with the standard 3D-printed OKR drum (0.02 cpd) was determined at 7 timepoints distributed  
126 throughout the light phases of the standard 14-hour light: 10-hour dark cycle (**Fig. 3A**). At 5 dpf, the  
127 trend observed was an increasing number of saccades until the afternoon with a subsequent drop in  
128 response (**Fig 3A**). The highest OKR response (29.8 saccades per minute) was observed at *early*  
129 *afternoon*/127.5 hpf, which was significantly higher ( $p=0.0001$ ) than the OKR responses observed at  
130 *early morning*/121.5 hpf (18.5 saccades per minute) or at *late afternoon*/129.5 hpf (18.4 saccades per  
131 minute). The *midday* and *early afternoon* responses on 5 dpf (125.5 and 127.5 hpf, respectively) were  
132 significantly greater than the corresponding time of day responses at 4 dpf (100.5 and 103.5 hpf,  
133 respectively).

134 To evaluate if the 5 dpf OKR behaviour varied with brightness intensities, the standard OKR was  
135 assessed under luminance ranging from 226.7-3616 candelas per square meter ( $\text{cd}/\text{m}^2$ ) (**Fig. 3B**). The  
136 largest OKR activity occurred at 3616 and 1426  $\text{cd}/\text{m}^2$  (25.1 and 23.5 saccades per minute,  
137 respectively). The responses at 769.1 and 226.7  $\text{cd}/\text{m}^2$  (13.1 and 12.6 saccades per minute,  
138 respectively) were significantly lower ( $p=0.0081$  and  $p=0.0035$ , respectively) than at 3616  $\text{cd}/\text{m}^2$ . In  
139 summary, the larval OKR shows response variations based on time of day recorded and light intensity  
140 used.

141

142 *The 2D/3D-printed Striped Patterns Enable Discrimination of Visual Acuity and Contrast Sensitivity*  
143 *in Larval Zebrafish.*

144 Establishment of affordable visual acuity and contrast sensitivity assays offers researchers the potential  
145 to identify more subtle defects in zebrafish vision than using standard OKR drums. Thus, bespoke 2D-  
146 printed striped patterns of 0.04 and 0.1 cpd for visual acuity were generated (*see Methods for details*)  
147 and tested (**Fig 4**). At 123 hpf, using *Protocol I* (*see Methods*), an increased number of stripes reduced  
148 the number of saccades per minute, but robust and reproducible responses were observed at each cpd

149 tested (**Fig. 4A**). At 0.04 cpd, the OKR activity (15.3 saccades/minute) was significantly ( $p < 0.0001$ )  
150 lower compared to the standard OKR pattern of 0.02 cpd (24.2 saccades per minute), but significantly  
151 higher than the response with the 0.06 cpd pattern (7.5 saccades per minute,  $p < 0.0001$ ). The average  
152 saccades per minute with the 0.06 cpd pattern (7.6 saccades per minute) is similar to the 0.1 and 0.2  
153 cpd pattern (6.9 and 7.9 saccades per minute respectively).

154 Contrast sensitivity assays were also performed using 2D printed drums and *Protocol I* at 125 hpf (**Fig**  
155 **4B**). The OKR activity evoked by the 0.02 cpd patterns with decreasing contrast was significantly  
156 reduced (80%,  $p = 0.0022$ ; 60%,  $p = 0.0001$ ; 40%,  $p = 0.004$ , and 20%,  $p < 0.0001$ ) compared to the  
157 standard OKR drum of 0.02 cpd and 100% contrast. For example, at 80% black-white contrast, the  
158 16.1 saccades per minute were significantly lower ( $p = 0.0022$ ) than the 21.2 saccades per minute  
159 evoked with the standard OKR drum pattern (0.02 cpd). There were no significant differences in  
160 response between the 80% contrast pattern and the 60% or 40% contrast pattern. The response from  
161 the 20% contrast pattern was significantly lower than with the 80% and 40% contrast pattern ( $p = 0.0091$   
162 and  $p = 0.0003$ , respectively). In summary, the 2D-printed patterns provide a simple and affordable  
163 method to assess contrast sensitivity and visual acuity assays in zebrafish larvae.

164  
165 *The Zebrafish Visual Acuity Response Shows Age-Dependent Variations.*

166 Using the 2D-printed patterns, we determined if the OKR-based visual acuity response varies with age  
167 in larval to juvenile zebrafish aged 6, 9, 12, 16 or 21 dpf. Interestingly, with *Protocol I* the measured  
168 VA responses decreased with age (**Fig. 5A**) for all tested patterns. The largest OKR response of 24.6  
169 saccades per minute was achieved at 5 dpf with a pattern of 0.02 cpd frequency (**Fig. 5A**). The lowest  
170 OKR response, with absence of any saccadic eye movements (0 saccades per minute), was obtained  
171 with 16 and 21 dpf zebrafish using patterns of 0.2 cpd (**Fig. 5A**). With patterns of 0.02 cpd, the OKR  
172 was significantly reduced at 16 dpf ( $p = 0.0016$ ) and 21 dpf ( $p < 0.0001$ ) compared to 5 dpf larvae, with  
173 62% and 76% reductions in eye saccades, respectively. With patterns of 0.06 cpd, the highest responses

174 were observed at 5 and 6 dpf (6.2 and 6.5 saccades per minute, respectively), which significantly  
175 declined at 16 dpf (0 saccades per minute,  $p < 0.0001$ ) and 21 dpf (0 saccades per minute,  $p < 0.0001$ )  
176 compared to 5 dpf. For the highest VA patterns tested (0.2 cpd, with highest number of stripes), the  
177 largest OKR response was observed in 5 dpf larvae (7.5 saccades per minute) and significantly reduced  
178 responses were observed in 9 (1.7 saccades per minute,  $p = 0.0004$ ), 16 (0 saccades per minute,  
179  $p < 0.0001$ ) and 21 (0 saccades per minute,  $p < 0.0001$ ) dpf zebrafish. Note, that at 16 dpf, when  
180 responses to VA and CS drums dropped, fish immobilisation in methylcellulose during drum  
181 stimulation was more difficult compared to earlier stages. In addition to observing an age-dependent  
182 reduction in OKR at each cpd frequency, we also observed that the level of response with the 0.06 and  
183 0.2 cpd patterns were much lower than with the 0.02 cpd standard drum (**Fig. 5A**). In *Protocol I*, the  
184 data is generated based on first testing larvae at the lowest spatial frequency, and subsequent testing in  
185 the next higher spatial frequency drum. Therefore, to assess whether the reduction in OKR response  
186 with drums of higher spatial frequency was due to adaptation to previous OKR stimuli, we repeated  
187 the assays at 5 and 16 dpf, using *Protocol II* (see *Methods for details*) where each fish was tested with  
188 only one drum pattern (**Fig. 4B**). In 5 dpf zebrafish, there was no significant difference in OKR  
189 response using *Protocol I* or *II* for 0.2 cpd pattern (**Fig. 5B**). There was a significant increase  
190 ( $p = 0.0017$ ) in OKR response of 5 dpf larvae with *Protocol II* compared to *Protocol I* with the 0.06 cpd  
191 pattern. (**Fig. 5B**). However, the *Protocol II* response of 10.6 saccades per minute with the 0.06 cpd  
192 pattern was still significantly lower ( $p < 0.0001$ ) than the 24.6 saccades per minute observed under  
193 *Protocol I* with the 0.02 cpd standard drum (**Fig. 5B**). In 16 dpf zebrafish, a slight but significant  
194 increase ( $p = 0.044$ ) in OKR response was noticed when *Protocol II* is compared to *Protocol I* with the  
195 0.06 cpd pattern. With the 0.2 cpd pattern and 16 dpf zebrafish there was no significant difference  
196 using *Protocol I* or *Protocol II*. At 16 dpf, the 0.06 cpd response obtained with *Protocol II* (2.1 saccades  
197 per minute) is significantly lower ( $p = 0.0204$ ) than the 0.02 cpd response (9.3 saccades per minute). In



198 summary, all the above suggests that VA measurements drop after 12 dpf. Additionally, care needs to  
199 be taken regarding a consistent order of testing the VA drums to avoid experimental artifacts.

200

201 *The Zebrafish Contrast Sensitivity Responses Show Age-Dependent Variations.*

202 Subsequently, we determined if the contrast sensitivity responses obtained using the 2D printed  
203 patterns displayed age-dependent variations. Using *Protocol I* and 0.02 cpd drums with 100% black-  
204 white contrast, the largest response of 25.2 saccades per minute was observed with 5 dpf larval  
205 zebrafish (**Fig. 6A**). Responses to these drums showed significant reduction with age, but reproducible  
206 visual behaviour responses were still observed with 16 and 21 dpf juvenile zebrafish (9.2 saccades per  
207 minute,  $p=0.0007$ ; and 6 saccades per minute,  $p<0.0001$ , respectively). Similarly, with the 20%  
208 contrast drums, the largest responses were observed with 5 and 6 dpf (11.5 and 16 saccades per minute,  
209 respectively) larvae. Numbers declined with age and significant reductions were observed in 12, 16  
210 and 21 dpf juveniles (3.7 saccades per minute,  $p=0.04$ ; 1 saccadic per minute,  $p=0.0019$ ; 0.1 saccades  
211 per minute,  $p<0.0001$ , respectively). As mentioned earlier, fish immobilisation and saccade counting  
212 in older fish is less consistent. Again, we utilised *Protocol II* to determine if reduced responses were  
213 due to desensitisation to consecutive stimuli. In 16 dpf zebrafish, there was no significant difference  
214 in OKR response using *Protocol I or II* when testing 20% contrast drums (**Fig. 6B**). In 5 dpf zebrafish,  
215 there was a significant increase ( $p=0.0002$ ) in OKR response at 20% contrast when Protocol II is  
216 compared to *Protocol I* (**Fig. 6B**). Indeed, the *Protocol II* response of 24.3 saccades per minute with  
217 the 20% contrast drum is equivalent to the response observed under *Protocol I* with 100% contrast  
218 (**Fig. 6B**), suggesting the diminished CS response is due to desensitisation. In summary, our data  
219 suggests that CS responses decrease significantly after 9 dpf, and highlight the importance of strict  
220 consistency to be taken while testing different CS patterns on the fish to avoid confounding.

221

222

## 223 **Discussion**

### 224 Affordability and Accessibility

225 The optokinetic response is a strong, innate visual behaviour that is very useful to characterise  
226 functional vision in zebrafish (12). We employed 2D and 3D printed patterns, of different stripe width  
227 or different black-white contrast, to effectively and affordably assay OKR, VA and CS in 5 to 21 dpf  
228 zebrafish. The remaining equipment required is accessible and affordable as suitable microscopes are  
229 commonly available in laboratories and the other components *e.g.* motor, light source and 2D/3D-  
230 printed patterns can be acquired easily and cost-effectively. Whilst automated or computerised devices  
231 were previously used to report optokinetic responses, those systems have high costs (up to €30,000),  
232 prohibitive to many research groups. Furthermore, computerised measurements of OKR, VA and CS,  
233 apply software to disaggregate the collective saccadic eye movement into eye velocity, gain or  
234 amplitude parameters (6, 15, 16). This requires establishment of thresholds based on algorithms and  
235 formulas using specialist programmes (6, 15). In summary, the manual OKR set-up described here,  
236 enables refined and accurate evaluation of OKR, VA and CS in zebrafish larvae, it is easy to use, does  
237 not require specialist software and is up to 10 times more affordable.

238

### 239 Effectiveness and Sensitivity

240 With the 2D and 3D printed patterns, the magnitude of the 5 dpf VA response progressively decreased  
241 from the 0.02 cpd (standard OKR) to the 0.2 cpd (finest stripe width tested) pattern. This inverse  
242 relationship between saccadic response and stripe width agrees with previous studies using digitalised  
243 OKR set-ups and a 0.02 – 0.2 cpd range of visual acuity patterns (15, 16). Notably, those studies, which  
244 pre-stimulated the larvae with a 0.06 cpd pattern before testing, reported 0.16 cpd as the highest VA  
245 pattern to evoke an OKR in 5 dpf larvae (15, 16). However, with our 2D and 3D printed drums, an  
246 even finer VA stimulus of 0.2 cpd elicits reproducible OKRs of 5.8-7.8 saccades per minute, providing  
247 enhanced ability to identify more subtle visual impairment phenotypes.

248

## 249 Diurnal Variability

250 There is clear evidence of dynamic anatomical and behavioural development of zebrafish vision up to  
251 5 dpf (9, 18-20). A previous analysis of diurnal variations in OKR at 5 dpf (21, 22) showed no  
252 difference in the number of saccades evoked during the day at 122 hpf (*early morning*; 27 saccades  
253 per minute) and 134 hpf (*early evening*; 25 saccades per minute), but dropping to 0 saccades per minute  
254 at 137 hpf (*night*) (21). Another study performed diurnal OKR analysis at different timepoints (22)  
255 wherein, at 125 hpf the OKR gain peaked and then decreased progressively at 129 and 133 hpf. Here,  
256 we investigate the OKR response between 4 and 5 dpf using even shorter time intervals. We found a  
257 cyclic modulation of OKR activity from a base of 19.5 saccades per minute at 100.5 hpf (*mid-day*) at  
258 4 dpf, reaching a peak of 29.8 saccades per minute at 127.5 hpf (*early afternoon*) on 5 dpf and then  
259 troughing at 18.4 saccades per minute at 129.5 hpf (*late afternoon*) on 5 dpf. The peak responses at  
260 125.5 and 127.5 hpf (26.8 and 29.5 saccades per minute) and diminished response at 129.5 hpf (18.4  
261 saccades per minute) are consistent with Huang *et al* (22). This diurnal variation may be attributed to  
262 circadian rhythms that drive diurnal and nocturnal behaviours in zebrafish (22, 23). In summary, a  
263 more extensive characterization at shorter times post-fertilization demonstrates significant diurnal  
264 variations in the OKR and highlights the importance of carefully controlling the time of day when  
265 OKR analysis is performed.

266

## 267 Light Variability

268 OKR gain, the ratio between eye velocity and stimulus velocity during the slow saccadic phase, was  
269 previously reported to increase with luminance from 0.38 cd/m<sup>2</sup> up to 388 cd/m<sup>2</sup> levels (16). Here, we  
270 demonstrate that higher luminance levels of 769.1 to 3616 cd/m<sup>2</sup> increase the saccadic frequency from  
271 13.1 to 25.1 saccades per minute. Notably, we did not, as in previous studies, measure the luminance  
272 from where the stimulus was projected (16). Instead our luminance was measured at the position of

273 the fish in the methylcellulose to measure the ambient illumination surrounding the fish more  
274 accurately. In summary, the luminance of the light source must be measured and controlled during all  
275 analyses to avoid this confounding variable which affects saccadic frequency.

276

#### 277 Contrast Sensitivity and Visual Acuity Detection

278 Previous VA studies on 5 dpf larvae report that the magnitude of the OKR gain or eye velocity between  
279 0.02 and 0.2 cpd was indirectly proportional to spatial frequency (15, 16). More specifically, an eye  
280 velocity of 4 degrees/second at 0.05 cpd reduced to 0 degrees/second (no eye movements) at 0.2 cpd  
281 (12). At the highest drum velocity tested (22.5 degrees per second) a gain response of 0.2 (max. gain=1)  
282 at 0.02 cpd decreased to 0.025 at 0.16 cpd, however, the gain peak of 0.3 was reported at a mid-  
283 frequency of 0.06 cpd (16). The VA responses with the 2D printed patterns concur with this spatial  
284 frequency-dependency as evidenced by 24.2 saccades per minute at 0.02 cpd reducing to 7.9 saccades  
285 per minute at 0.2 cpd, the latter response contrasting with no eye movements using the computerised  
286 OKR hardware. Thus, the OKR set-up described here emulates VA responses of automatic devices  
287 (15, 16) and furthermore, it detects quantifiable responses at higher spatial frequencies (12, 13).

288 CS analysis using the 2D-printed drums (20-100%) at 5 dpf show a similar trend as previously reported  
289 with computerised set-ups (0.7 to 100% contrast). A higher number of OKR saccades or greater OKR  
290 gain is observed as the black-white contrast increases (16, 24). Notably, these computerised devices  
291 reported a low gain (16) and no eye movements (24) at 20% black-white contrast. However, our  
292 manual OKR set-up evokes reproducible OKR saccades of 12.1 per minute at the 20% black-white  
293 contrast. Hence, our affordable 2D-printed drums can elicit OKR responses that discriminate higher  
294 visual acuity frequencies and lower black-white contrast enabling more sensitive detection of VA and  
295 CS in 5 dpf zebrafish.

296

#### 297 Age Variability

298 OKR analysis in juvenile zebrafish older than 5 dpf was previously reported using computerised OKR  
299 set-ups (6, 12, 16). Orger *et al* (12) used a lower drum velocity (10 degrees per second) and described  
300 the standard OKR activity at 7 dpf, showing robust eye saccades through a motion detection OKR.  
301 Beck *et al* (6) investigating the OKR phases from 5 to 35 dpf, found that at 50 degrees per second  
302 drum velocity, gain decreased in all tested ages (5 to 35 dpf). Here, we use the 2D-printed drums to  
303 describe the saccadic frequency of 5 to 21 dpf zebrafish based on spatial frequency (**Fig. 5A**). As  
304 zebrafish became older, the saccadic frequency was decreased when spatial frequency was increased.  
305 We obtained quantifiable responses at all tested ages except at 16 and 21 dpf using our 0.06 and 0.2  
306 cpd patterns. This reduction when zebrafish were older, was also observed using 100% and 20% black-  
307 white contrast 2D-printed patterns in 5 to 21 dpf zebrafish (**Fig. 6A**). At 6 dpf, Rinner *et al* (16)  
308 previously reported that OKR gain with 100% black-white contrast was approximately 0.7, decreasing  
309 to 0.3 with 20% black-white contrast. This response is similar to what we obtained at 6 dpf using the  
310 2D-printed patterns, where 23.6 saccades per minute were obtained at 100% black-white contrast,  
311 decreasing to 11.5 saccades per minute at 20% black-white contrast. In summary, our data suggests  
312 that manual VA/CS analysis, using 2D-printed patterns, can be used to detect spatial frequency and  
313 contrast discrimination by zebrafish larvae at 6, 9, 12, 16 and 21 dpf.

314

#### 315 Protocol Variability/Desensitisation

316 The significant drop of VA and CS response observed after 16 dpf may be explained by the use of  
317 methylcellulose to immobilise the larvae, but which is also reported to hamper oxygen exchange in  
318 zebrafish older than 7 dpf and to decrease the OKR gain (9).

319 Studies on adult zebrafish, aged between 4-16 (25) and 12-24 (17) months, placed the fish further from  
320 the stimulus, *i.e.* 7.3 cm (25) and 19.5 (17) cm *versus* the 3 cm used here. According to the visual  
321 acuity concept and VA examinations in children (26), the eye to stimulus distance should be increased

322 with age, which suggests that 16 dpf could be a “key” time-point to increase the distance stimulus-eye  
323 in zebrafish.

324 We considered that habituation could also account for reduced VA/CS at older stages. However, using  
325 16 dpf naïve larvae (*Protocol II*), responses at highest spatial frequencies (0.2 cpd) and lowest contrast  
326 (20% black-white contrast) were similar as those tested in 16 dpf in *Protocol I*. Our overall  
327 interpretation is that, in general, *Protocol I* is more suitable to conduct VA/CS studies in zebrafish  
328 larvae due to ethical considerations to reduce the number of individuals used, while enabling follow-  
329 up of VA or CS multiple data obtained from a single specimen. *Protocol II* could be however more  
330 suitable, if obtaining maximum responses at 5 dpf is relevant for the study.

331

### 332 **Conclusions**

333 The OKR set-up described here can be easily and cost-effectively acquired to measure OKR. Our 2D-  
334 printed patterns can reliably and feasibly quantify VA and CS response in zebrafish larvae from 5 to  
335 16 dpf. The age of the fish used, the time of the day the assay performed, the light levels within the  
336 fish position and pre-stimulation can vary the OKR response and must be accurately determined for a  
337 consistent OKR, VA and CS analysis. The 2D/3D drums and methods described here can be utilised  
338 to identify and characterise more effectively zebrafish models with visual deficits.

339 **Material and Methods.**

340 *Zebrafish husbandry.*

341 Adult wild-type (*wt-Tübingen*) zebrafish were maintained in holding tanks on a 14:10 h light-dark  
342 cycle in a recirculating water system under environmental parameters averaging temperature of 28°C,  
343 conductivity of 1347 µS and pH of 7.1 (27). Adult *wt* zebrafish were fed shrimp and dry pellet food  
344 twice daily. After the noon feed, male and female adults were placed in breeding tanks and *wt* zebrafish  
345 embryos obtained by natural spawning, collected the next morning and raised in embryo medium  
346 (0.137 M NaCl, 5.4 mM KCl, 5.5 mM Na<sub>2</sub>HPO<sub>4</sub>, 0.44 mM KH<sub>2</sub>PO<sub>4</sub>, 1.3 mM CaCl<sub>2</sub>, 1.0 mM MgSO<sub>4</sub>  
347 and 4.2 mM NaHCO<sub>3</sub> with 1 ml methylene blue) until 5 days post-fertilisation (dpf). Larvae were fed:  
348 i) SDS 100 and paramecium from 5 to 10 dpf, ii) SDS 100, paramecium and shrimp from 11 to 20 dpf,  
349 and iii) SDS 200 and shrimp from 21 to 28 dpf. All experiments using animals were approved by  
350 ethical approval granted by the UCD Animal Research Ethics Committee (AREC).

351

352 *Optokinetic Response Equipment.*

353 A simple and affordable OKR apparatus (**Fig. 1**) was assembled with a Nikon SMZ800 microscope  
354 (Micron Optical) to observe zebrafish eye movements; an electronic motor (RS Radionics) connected  
355 to a non-patterned 6 cm rotating circular base in which the 2D printed striped stimulus pattern was  
356 placed (**Fig 1C**). A Schott KL2500 LED light source (Mason technologies) fitted with dual goose neck  
357 lightguides was positioned to illuminate inside the drum (**Fig. 1B**). The dimensions of the 2D-printed  
358 striped patterns, generated with MS PowerPoint® and printed on stock cardboard, were 3.4 cm high  
359 and 6 cm in diameter (**Fig. 1D** and **Additional file 1**). The visual acuity drums ranging from 0.02 - 0.2  
360 cycles per degree (cpd) were chosen based on a previous publication (15). They were designed by  
361 changing the width of the 100% black and white contrast stripes to the calculated cycles per degree  
362 ( $\text{cpd} = n^\circ \text{ of cycles} / 360^\circ$ ) when mounted on the rotating base. Contrast sensitivity drums ranging from  
363 100 - 20% were generated by degrading horizontally from the lateral sides to the centre and then

364 changing the transparency percentage of the centre of the black stripes with all retaining 0.02  
365 cycles/degree. Additional visual acuity drums were printed with 3D printing technology in polylactic  
366 acid (PLA), a stronger thermoplastic (Materialise UK Ltd) and placed on rotating circular base (**Fig.**  
367 **1E**). 3D drums were designed following the same parameters as 2D-printed patterns (height= 5 cm;  
368 diameter=6 cm; cpd=0.02, 0.06 and 0.2;>99% contrast).

369

#### 370 *Luminance measurement*

371 An LS-100 luminance meter (Konica Minolta) measured, in candela per square meter (cd/m<sup>2</sup>), the light  
372 reflected from the drum under different light intensity settings of the Schott 2500. The luminance meter  
373 was placed at 18 cm horizontally and 30 cm high from the centre of the Petri dish at 60° angle. We  
374 establish 4 measurements at 22.7, 12, 7 and 2%, corresponding to 3616, 1426, 769.1 and 226,7 cd/m<sup>2</sup>.

375

#### 376 *Drum velocity*

377 The drum base was rotated with a constant angular velocity of 100 degrees per second.

378

#### 379 *Visual Acuity and Contrast Sensitivity Methods (Protocols I and II).*

380 To measure saccades/minute, a 6 cm Petri dish with 9% methylcellulose (Sigma Aldrich, UK) diluted  
381 in embryo medium was placed inside the rotating drum. From another Petri dish, larval or juvenile  
382 zebrafish in embryo medium were randomly chosen and immobilised in the centre of the OKR Petri  
383 dish with 9% methylcellulose. Rotating the patterned drums 30 seconds clockwise, followed by 30  
384 seconds counterclockwise at 100 degrees/second, evoked horizontal eye movements which were  
385 counted manually. The standard OKR utilised a drum with 0.02 cpd and 100% black-white striped  
386 contrast (**Fig. 3, Additional file 1A**). For visual acuity assays, the OKR was performed with 2D printed  
387 patterns of 0.02, 0.04, 0.06, 0.1 and 0.2 cpd and 100% black stripe contrast for all cpd tested (**Fig. 4A,**  
388 **Additional file 1A-E**). In the contrast sensitivity assays, OKR was performed with 2D printed patterns



389 of 100%, 80% 60%, 40% and 20% black/grey-white striped contrast, and 0.02 cpd all percentages  
390 (**Fig. 4B, Additional file 1F-I**). Drums were presented following that order, from lowest to highest  
391 spatial frequency and from highest to lowest black striped contrast. Two different protocols (*I and II*)  
392 were applied. In *Protocol I*, a zebrafish larva was randomly chosen, placed central of the 0.02 cpd  
393 drum and saccades per minute were counted. Subsequently and consecutively, the drum was replaced  
394 with one of higher spatial frequency (for visual acuity) or lower contrast (contrast sensitivity) and  
395 saccades per minute counted. After completing one set of drums, another larva was randomly selected  
396 and used to repeat the same drum sequence. In *Protocol II*, instead of presenting each drum of a series  
397 to the same larva, different specimens were used for each drum, i.e. larvae were naïve for OKR. In  
398 practice, a larva was analysed with 0.02 drum, saccades per minute were counted and next replaced by  
399 another larva which was subjected again to the same drum. This procedure was repeated for the rest of  
400 the drum patterns.

401

#### 402 *Statistical analysis*

403 Statistical analysis was completed using GraphPad Prism 7.00 software (GraphPad, San Diego, CA).  
404 One-way repeated measures ANOVA was employed to determine significant differences between  
405 groups followed by Bonferroni's multiple comparisons test. Significance levels were set at  $p < 0.05$ .

406

407

408

409

410

411

412

413

414

415

416 **List of abbreviations**

417

418 AREC: Animal Research Ethics Committee

419 Cd/m<sup>2</sup>: candela per square meter

420 Cpd: Cycles per degree

421 Cm: centimetres

422 CS: Contrast sensitivity

423 Dpf: Days post-fertilization

424 Hpf: hours post-fertilization

425 OKN: Optokinetic nystagmus

426 OKR: Optokinetic response

427 PLA: Polylactic acid

428 VA: Visual acuity

429 Wt: wild type

430

431

432

433

434

435

436 **Declarations**

437 **Ethics approval and consent to participate**

438 All experiments carried out on zebrafish were performed according to ethical approval granted by the  
439 UCD Animal Research Ethics Committee (AREC-Kennedy).

440 **Consent for publication**

441 Not applicable

442 **Availability of data and materials**

443 All data generated or analysed during this study are included in this published article (and its  
444 additional information files).

445 **Competing interests**

446 The authors declare that they have no competing interests

447 **Funding**

448 This work was funding by 3DNEONET Project “Drug Discovery & Delivery Network for Oncology  
449 and Eye Therapeutics” [3DNEONET/GA734907] and CRYSTAL3 project (Commercial & Research  
450 Opportunity for Cysteinyl Leukotriene Signalling in Ocular & CNS Dysfunction, Cancer and  
451 Cardiovascular Disease” [grant number 101007931] funded under the Research Innovation Staff  
452 Exchange Marie Skolowdoska Curie H2020 programme

453 **Authors' contributions**

454 AGS carried out and analysed all the experimental data. YA supervised the study and provided  
455 contributions in drafting and writing the manuscript. BNK conceived, designed and supervised the  
456 study, and provided major contributions in drafting and writing the manuscript. All authors read and  
457 approved the final manuscript.

458 **Acknowledgements**

459 The authors thanks to Dr. Rebecca Ward and Ailis Moran for their assistance and helpful discussions  
460 related to this project.

461 **Authors' information**

462 Affiliations

463 **Ocupharm Diagnostic Group Research, Faculty of Optic and Optometry, Universidad**

464 **Complutense de Madrid, Madrid, Spain**

465 AGS, BC

466 **UCD Conway Institute of Biomolecular and Biomedical Research, University College Dublin,**

467 **Belfield, Dublin 4, Ireland.**

468 AGS, YA, BNK

469 **UCD School of Biomolecular and Biomedical Science, University College Dublin, Belfield,**

470 **Dublin 4, Ireland.**

471 YA, BNK

472 **Corresponding author**

473 Correspondence to Brendan N. Kennedy.

474

475

476

477

478

## 479 References

480

- 481 1. Ward R, Ali Z, Slater K, Reynolds AL, Jensen LD, Kennedy BN. Pharmacological restoration of visual  
482 function in a zebrafish model of von-Hippel Lindau disease. *Dev Biol.* 2020;457(2):226-34.
- 483 2. Sundaramurthi H, Roche SL, Grice GL, Moran A, Dillion ET, Campiani G, et al. Selective Histone  
484 Deacetylase 6 Inhibitors Restore Cone Photoreceptor Vision or Outer Segment Morphology in Zebrafish and  
485 Mouse Models of Retinal Blindness. *Frontiers in Cell and Developmental Biology.* 2020;8(689).
- 486 3. Franco- Gutiérrez V P-VP. Exploración oculomotora. 2018. p. 169-92.
- 487 4. Distler C, Hoffmann KP. [Animal models for the optokinetic system of the human]. *Klin Monbl*  
488 *Augenheilkd.* 1999;215(2):78-85.
- 489 5. Kretschmer F, Sajgo S, Kretschmer V, Badea TC. A system to measure the Optokinetic and Optomotor  
490 response in mice. *J Neurosci Methods.* 2015;256:91-105.
- 491 6. Beck JC, Gilland E, Tank DW, Baker R. Quantifying the Ontogeny of Optokinetic and Vestibuloocular  
492 Behaviors in Zebrafish, Medaka, and Goldfish. *Journal of Neurophysiology.* 2004;92(6):3546-61.
- 493 7. Wester ST, Rizzo JF, III, Balkwill MD, Wall C, III. Optokinetic Nystagmus as a Measure of Visual Function  
494 in Severely Visually Impaired Patients. *Investigative Ophthalmology & Visual Science.* 2007;48(10):4542-8.
- 495 8. Shin YJ, Park KH, Hwang J-M, Wee WR, Lee JH, Lee IB. Objective Measurement of Visual Acuity by  
496 Optokinetic Response Determination in Patients With Ocular Diseases. *American Journal of Ophthalmology.*  
497 2006;141(2):327-32.
- 498 9. Huang YY, Neuhauss SC. The optokinetic response in zebrafish and its applications. *Front Biosci.*  
499 2008;13:1899-916.
- 500 10. Richardson R, Tracey-White D, Webster A, Moosajee M. The zebrafish eye—a paradigm for  
501 investigating human ocular genetics. *Eye.* 2017;31(1):68-86.
- 502 11. Fleisch VC, Neuhauss SC. Visual behavior in zebrafish. *Zebrafish.* 2006;3(2):191-201.
- 503 12. Orger MB, Gahtan E, Muto A, Page-McCaw P, Smear MC, Baier H. Behavioral Screening Assays in  
504 Zebrafish. *Methods in Cell Biology.* 77: Academic Press; 2004. p. 53-68.
- 505 13. Deeti S, O'Farrell S, Kennedy BN. Early safety assessment of human oculotoxic drugs using the zebrafish  
506 visualmotor response. *J Pharmacol Toxicol Methods.* 2014;69(1):1-8.
- 507 14. Brockerhoff SE. Measuring the optokinetic response of zebrafish larvae. *Nature Protocols.*  
508 2006;1(5):2448-51.
- 509 15. Haug MF, Biehlmaier O, Mueller KP, Neuhauss SC. Visual acuity in larval zebrafish: behavior and  
510 histology. *Front Zool.* 2010;7:8.
- 511 16. Rinner O, Rick JM, Neuhauss SC. Contrast sensitivity, spatial and temporal tuning of the larval zebrafish  
512 optokinetic response. *Invest Ophthalmol Vis Sci.* 2005;46(1):137-42.
- 513 17. Tappeiner C, Gerber S, Enzmann V, Balmer J, Jazwinska A, Tschopp M. Visual acuity and contrast  
514 sensitivity of adult zebrafish. *Frontiers in Zoology.* 2012;9(1):10.
- 515 18. Easter SS, Jr., Nicola GN. The development of eye movements in the zebrafish (*Danio rerio*). *Dev*  
516 *Psychobiol.* 1997;31(4):267-76.
- 517 19. Easter SS, Jr., Nicola GN. The development of vision in the zebrafish (*Danio rerio*). *Dev Biol.*  
518 1996;180(2):646-63.
- 519 20. Brockerhoff SE, Hurley JB, Janssen-Bienhold U, Neuhauss SC, Driever W, Dowling JE. A behavioral  
520 screen for isolating zebrafish mutants with visual system defects. *Proceedings of the National Academy of*  
521 *Sciences of the United States of America.* 1995;92(23):10545-9.
- 522 21. Emran F, Rihel J, Adolph AR, Dowling JE. Zebrafish larvae lose vision at night. *Proceedings of the*  
523 *National Academy of Sciences.* 2010;107(13):6034-9.
- 524 22. Huang D-f, Wang M-y, Yin W, Ma Y-q, Wang H, Xue T, et al. Zebrafish Lacking Circadian Gene *per2*  
525 Exhibit Visual Function Deficiency. *Frontiers in Behavioral Neuroscience.* 2018;12(53).
- 526 23. Cahill GM. Clock mechanisms in zebrafish. *Cell and Tissue Research.* 2002;309(1):27-34.

- 527 24. Mueller KP, Schnaedelbach ODR, Russig HD, Neuhauss SCF. VisioTracker, an innovative automated  
528 approach to oculomotor analysis. *Journal of visualized experiments : JoVE*. 2011(56):3556.  
529 25. Cameron DJ, Rassamdana F, Tam P, Dang K, Yanez C, Ghaemmaghami S, et al. The optokinetic response  
530 as a quantitative measure of visual acuity in zebrafish. *J Vis Exp*. 2013(80).  
531 26. García Aguado J, Sánchez Ruiz-Cabello FJ, Colomer Revuelta J, Cortés Rico O, Esparza Olcina MJ, Galbe  
532 Sánchez-Ventura J, et al. Valoración de la agudeza visual. *Pediatría Atención Primaria*. 2016;18:267-74.  
533 27. Kennedy G, Sundaramurthi H, Staff UBF, Kennedy B. Zebrafish Facility Environmental Parameters.  
534 University College Dublin (UCD) protocols.io; 2020.

535

536

537

### 538 **Additional files**

- 539 Additional file 1 (.pdf): 2D Visual Acuity and Contrast Sensitivity patterns. 2D-printed patterns to  
540 perform Visual Acuity and Contrast Sensitivity assays.

541

542

543

544

545

546

547

548

549

550

551 **Figures**

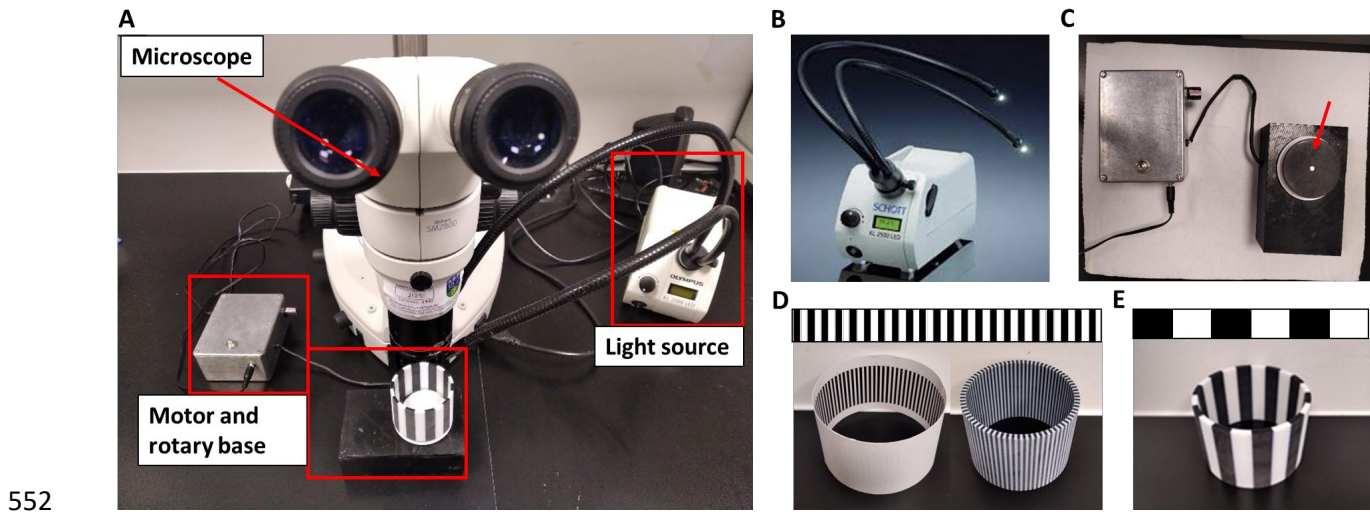

553 **Fig 1. Optokinetic Response Equipment.** A. Fully assembled Optokinetic Response apparatus. B.  
554 KL 2500 LED Schott light source C. Motorised rotary base to assemble the OKR drums (arrow). D.  
555 Optokinetic Response 2D (left) and 3D (right) drums of 0.2 cpd. E. Optokinetic Response 3D drum of  
556 0.02 (standard OKR).

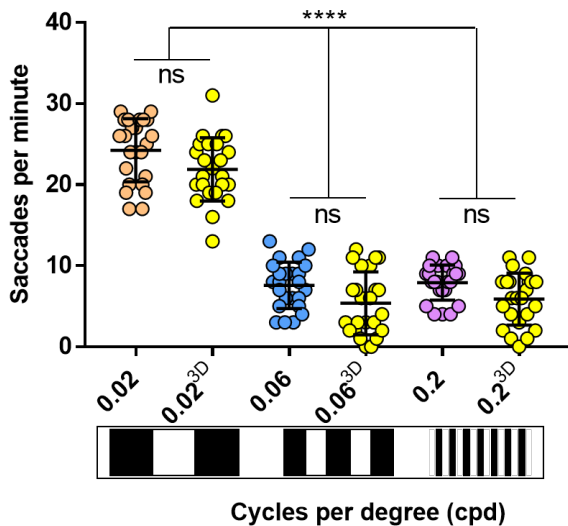

558 **Fig. 2. 2D drums evoke same saccades frequency as 3D drums.** Visual acuity responses obtained  
559 with 3D drums (yellow dots) don't vary with respect of cardboard-printed drums (0,02 cpd, orange  
560 dots; 0,06 cpd, blue dots; 0,2 cpd, purple dots). 0.06 and 0.2 cpd responses evoked with 2D and 3D-

561 printed drums were significant lower than standard OKR activity (0.02 cpd) with 2D and 3D-printed  
 562 drums. Data were analyzed by one way ANOVA and Bonferroni's multiple comparison test, where ns  
 563 is no significant difference ( $p > 0.05$ ) and \*\*\*\*= $p < 0.0001$ . Error bars indicate standard deviation. 3  
 564 replicates of 8 larvae per each drum,  $n = 24$ .

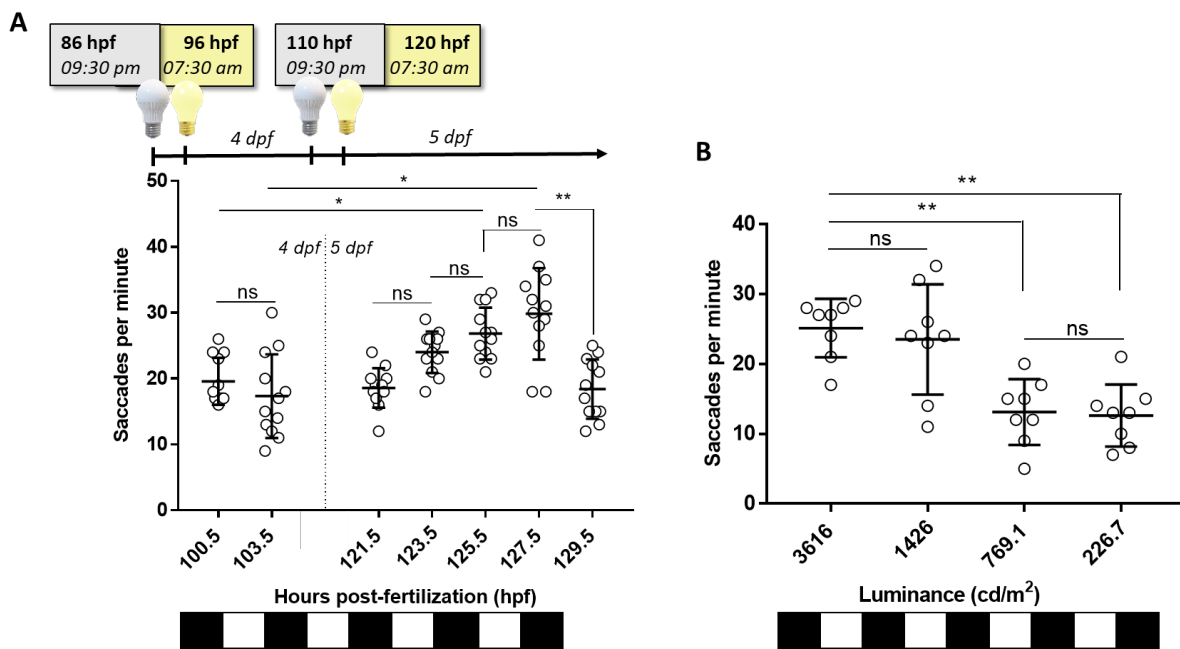

565

566 **Fig 3. OKR Response is Modulated by Time of Day and Luminance Levels.** A. Standard  
 567 Optokinetic Response (0.02 cpd, 100% black contrast, 3616 cd/m<sup>2</sup>) at different timepoints along 4 and  
 568 5 dpf. Equivalent times (100.5 vs. 125.5 hpf; 103 vs. 127.5 hpf) show an increase OKR between 4 and  
 569 5 dpf. Highest Optokinetic Response yields at 127.5 hpf. B. Standard Optokinetic Response (0.02 cpd,  
 570 100% black contrast) at different levels of luminance at 125 hpf. Higher levels of luminance evoked  
 571 a better response on zebrafish but at 1426 cd/m<sup>2</sup>, OKR response is more variable (SD=7.8 saccades  
 572 per minute) than 3616 cd/m<sup>2</sup> (SD=4.1 saccades per minute). Data were analyzed by one-  
 573 way ANOVA and Bonferroni's multiple comparison tests, where ns is no significant difference,  
 574 ( $p > 0.05$ ), \*\*= $p < 0.01$  and \*\*\*\*= $p < 0.0001$ . Error bars indicate standard deviation. 1 replicate of 12  
 575 larvae per each timepoint,  $n = 12$ .



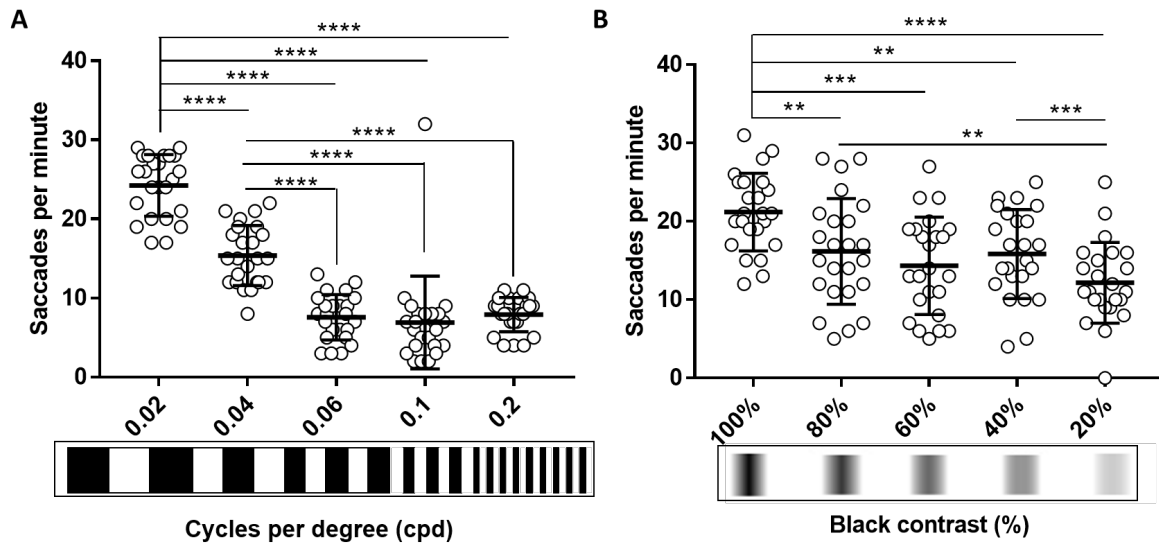

576

577

578 **Fig. 4. The 2D-printed Drums Enable Discrimination of Visual Acuity and Contrast Sensitivity**

579 **in Larval Zebrafish.** A. 5 dpf wild-type zebrafish larvae Visual Acuity decrease progressively when

580 width of the stripes is reduced compared to standard OKR and 0.04 cpd. From 0.06 cpd, response is

581 constant. B. 5 dpf wild-type zebrafish larvae Contrast Sensitivity decrease slowly when contrast

582 between black-white stripes is lowered compared to standard OKR. 20% black contrast evokes the

583 lowest response. Data were analyzed by RM one-way ANOVA and Bonferroni's multiple comparison

584 test, where ns is no significant difference, ( $p > 0.05$ ),  $** = p < 0.01$ ,  $*** = p < 0.001$  and  $**** = p < 0.0001$ .

585 Error bars indicate standard deviation. 3 replicates of 8 larvae,  $n = 24$  larvae per each pattern.

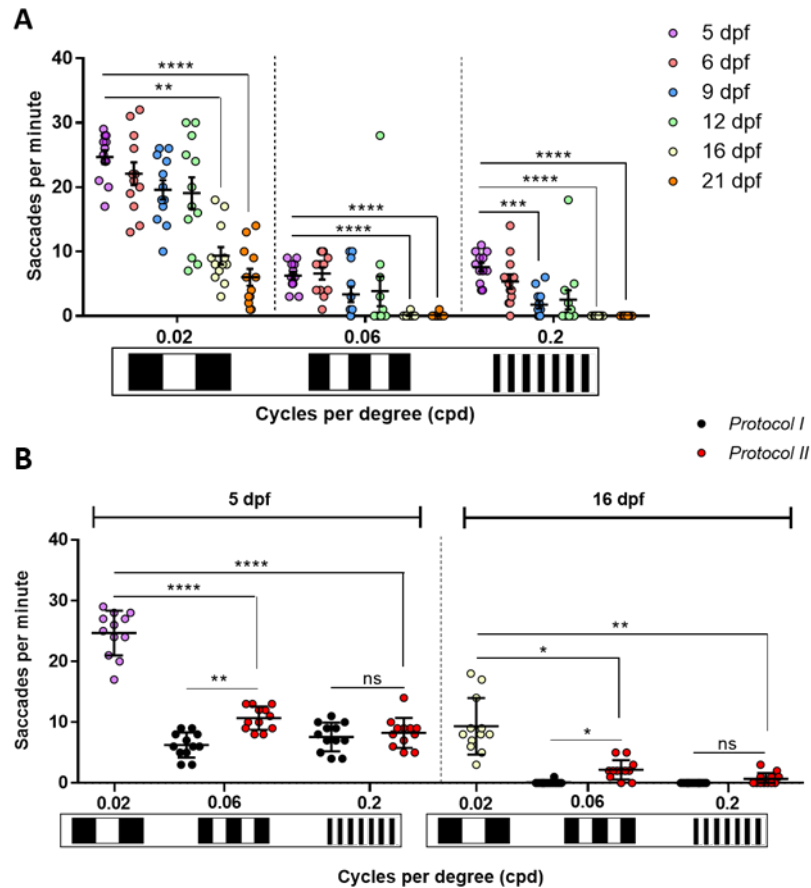

586

587 **Fig. 5. The Zebrafish Visual Acuity Responses Shows Age-Dependent Variations.** A. Visual  
588 Acuity of zebrafish from 5 to 21 dpf drops significantly from 16 dpf following *Protocol I* at 0.02,  
589 0.06 and 0.2 cpd. At 0.2 cpd, this decreased response is also remarkable on 9 dpf. 1 replicate of 12  
590 larvae per each set of patterns. B. Comparison of Visual Acuities measured with *Protocol I* (black  
591 dots) and *Protocol II* (red dots) on 5 dpf and 16 dpf. 0.02 cpd responses at 5 dpf (purple dots) and 16  
592 dpf (white dots) belong to *Protocol I* and *Protocol II* as it is the first pattern tested. There is no  
593 difference between both protocols except at 0.06 cpd where 5 dpf naïve larvae showed a higher number  
594 of saccades. Data were analyzed by RM one-way ANOVA and Bonferroni's multiple comparison test,  
595 where ns is no significant difference, ( $p > 0.05$ ), \*\*= $p < 0.01$ , \*\*\*= $p < 0.001$  and \*\*\*\*= $p < 0.0001$ . Error  
596 bars indicate standard error of mean in A and standard deviation in B. 1 replicate of 12 independent  
597 larvae for each pattern,  $n = 12$ .

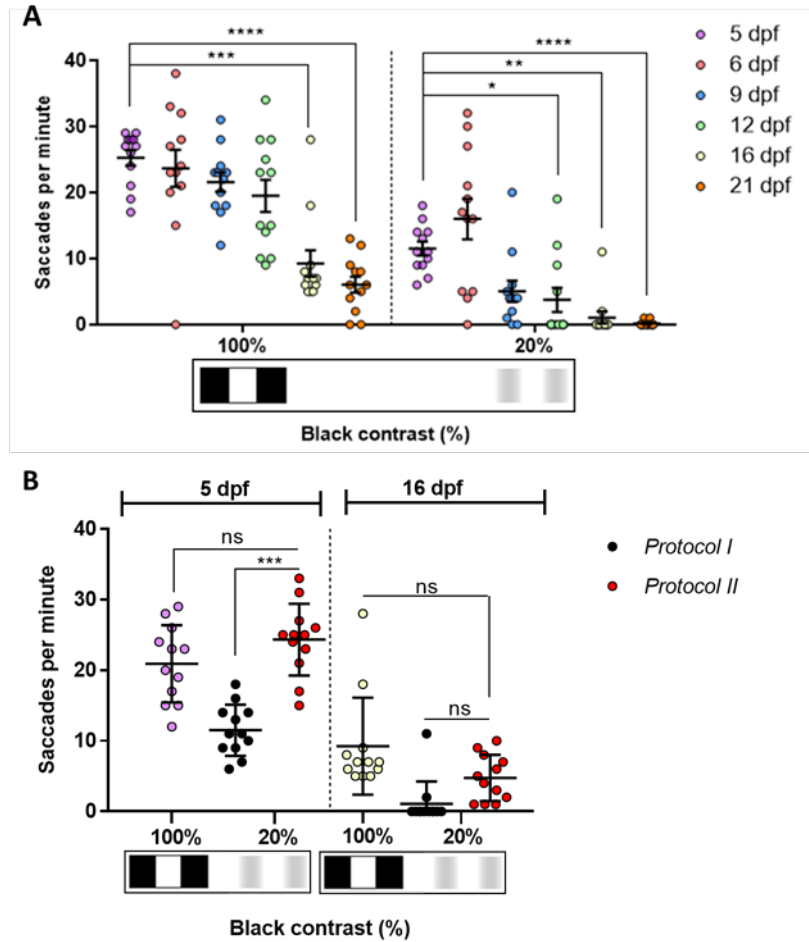

598

599

600 **Fig. 6. The Contrast Sensitivity response of juvenile zebrafish diminish with age.** A. OKR  
601 response to 20% is significant at 12, 16 and 21 dpf. B. Comparison of contrast sensitivity responses  
602 measured with *Protocol I* (black dots) and *Protocol II* (red dots). 100% black contrast at 5 dpf (purple  
603 dots) and 16 dpf (white dots) belong to *Protocol I* and *Protocol II* as it is the first pattern tested.  
604 Responses of 20% black contrast with *Protocol II* are higher than when evoked with *Protocol I*.  
605 However, there are not differences between both protocols at 16 dpf. Data were analyzed by RM one-  
606 way ANOVA and Bonferroni 's multiple comparison test, where ns is no significative difference,  
607 ( $p > 0.05$ ),  $*p < 0.05$ ,  $**p < 0.01$ ,  $***p < 0.001$  and  $****p < 0.0001$ . Error bars indicate standard error  
608 of mean in A and standard deviation in B. 1 replicate of 12 independent larvae for each pattern,  $n = 12$ .

609
